# Supplementary material for: Hydrogen-bonded organic framework-stabilized charge transfer cocrystals for NIR-II photothermal cancer therapy
Source: Royal Society of Chemistry journal article supplement (doi:10.1039/d3tb01475d), 2023-01-01
Supplement: d3tb01475d1.pdf [file d3tb01475d1.pdf]

## Supporting Information

### Hydrogen-Bonded Organic Frameworks-stabilized Charge Transfer Cococrystals for NIR-II Photothermal Cancer Therapy

*Jiakang Tang*<sup>[a][b]</sup> *Leihou Shao*<sup>[a][b]</sup> *Ji Liu*<sup>[a][b]</sup> *Qizhen Zheng*<sup>[a][b]</sup> *Xinyi Song*<sup>[c]</sup>,  
*Lanhua Yi*<sup>[c]</sup>\* *Ming Wang*<sup>[a][b]</sup>\*

[a] Jiakang Tang, Leihou Shao, Ji Liu, Qizhen Zheng, Prof. Dr. Ming Wang

Beijing National Laboratory for Molecular Sciences

CAS Key Laboratory of Analytical Chemistry for Living Biosystems

Institute of Chemistry, Chinese Academy of Sciences

Beijing 100190, China

E-mail: [mingwang@iccas.ac.cn](mailto:mingwang@iccas.ac.cn)

[b] Jiakang Tang, Leihou Shao, Ji Liu, Qizhen Zheng, Prof. Dr. Ming Wang

University of Chinese Academy of Sciences

Beijing 100049, China

[c] Xinyi Song, Prof. Dr Lanhua Yi

Key Laboratory of Environmentally Friendly Chemistry and Applications of

Ministry of Education, School of Chemistry, Xiangtan University, Xiangtan

411105, PR China

Email: [yilanhua@xtu.edu.cn](mailto:yilanhua@xtu.edu.cn)

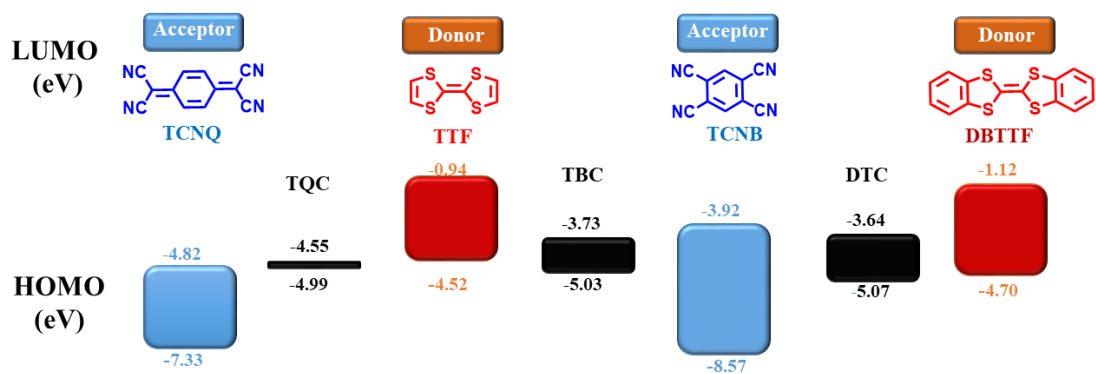

**Figure S1** Schematic illustration of the HOMO-LUMO energy bandgap of the electron donor-acceptor pair used for self-assembling CT cocrystals.

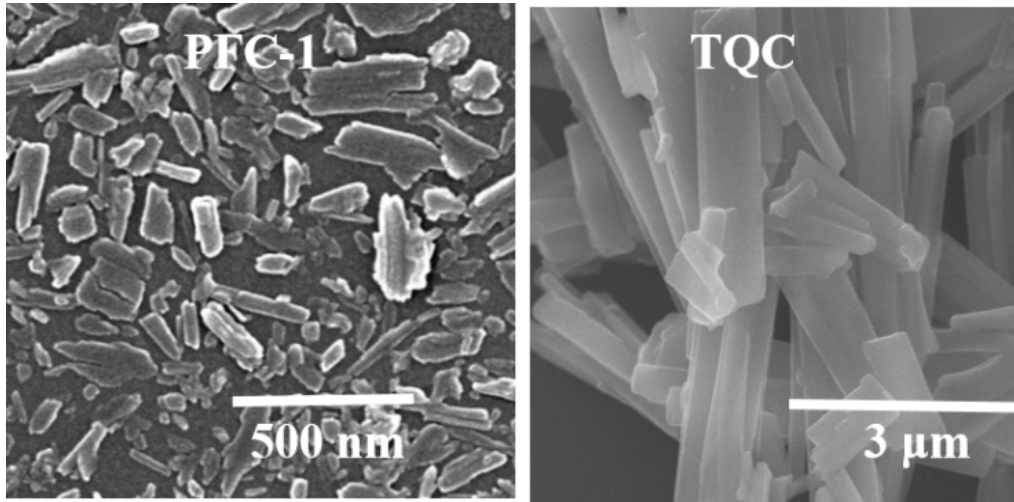

**Figure S2** SEM images of PFC-1 and TQC.

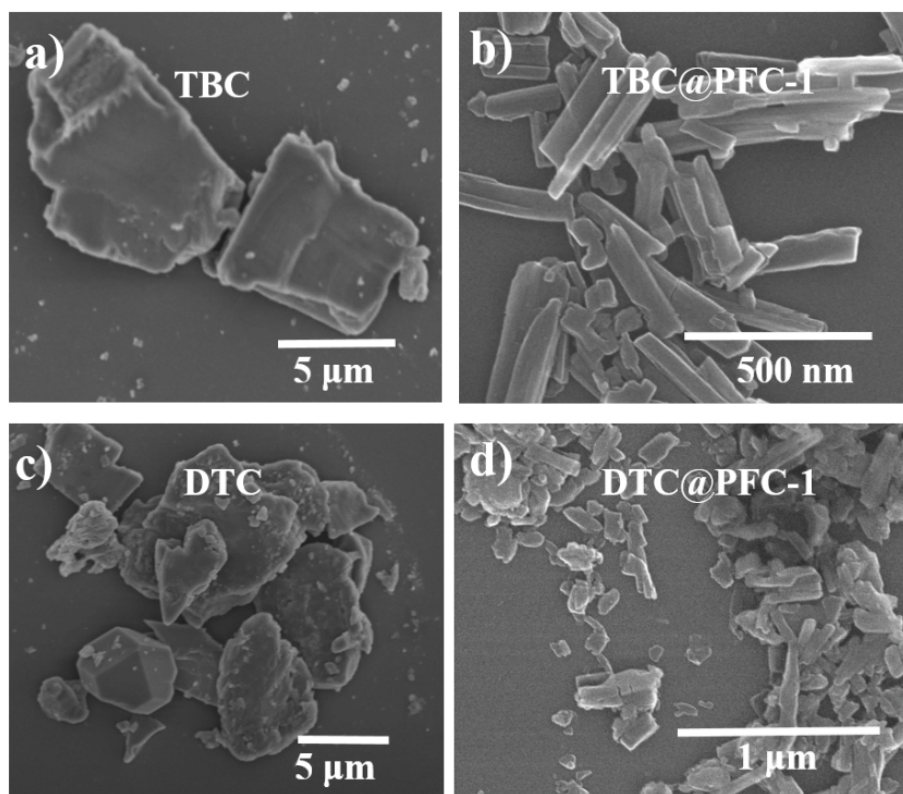

**Figure S3** SEM images of TBC (a), TBC@PFC-1 (b), DTC (c) and DTC@PFC-1 (d).

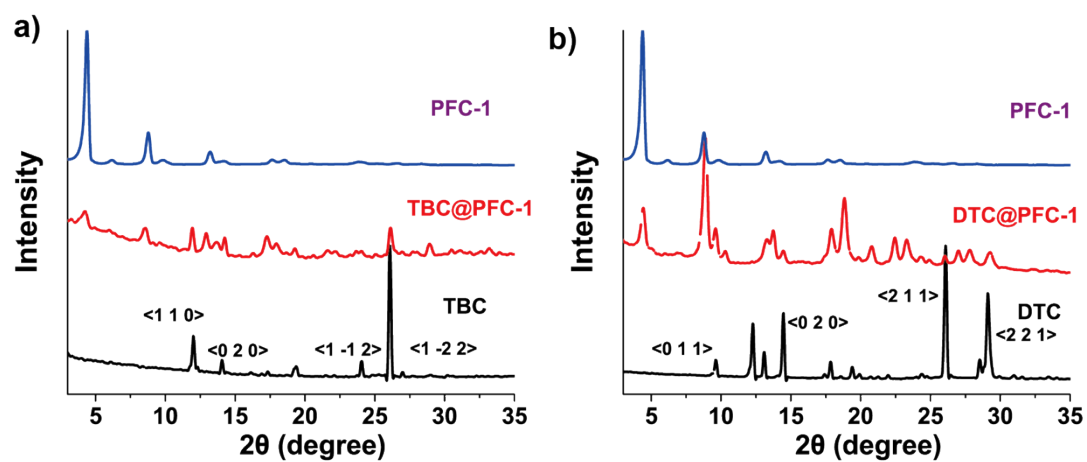

**Figure S4** PXRD spectra of (a) PFC-1, TBC and TBC@PFC-1; (b) DTC and DTC@PFC-1.

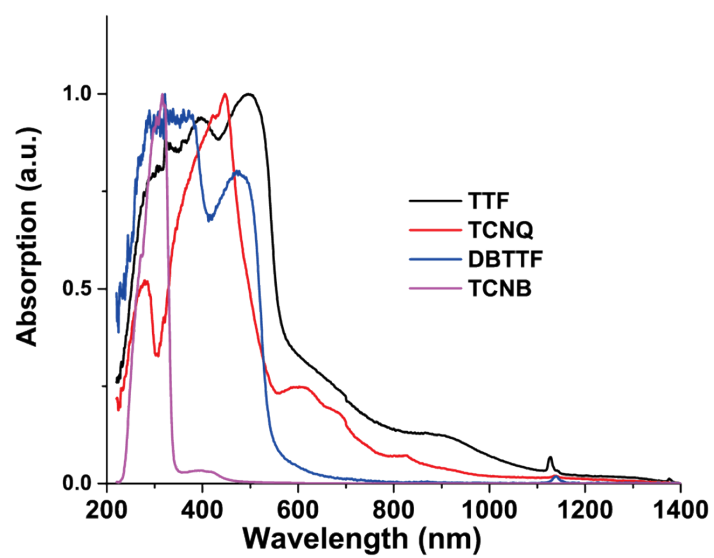

**Figure S5** Solid-state absorption spectra of TTF, TCNQ, DBTTF and TCNB.

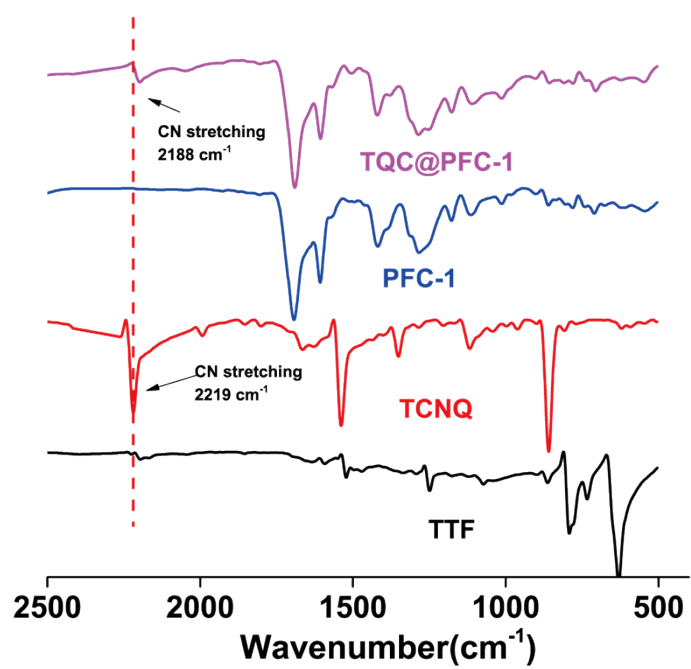

**Figure S6** FT-IR spectra of PFC-1, TTF, TCNQ and **TQC@PFC-1**.

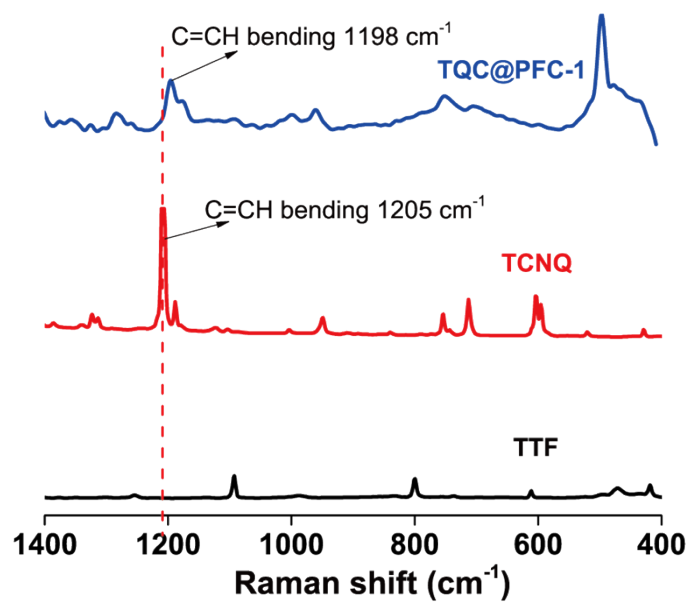

**Figure S7** Raman spectra of TTF, TCNQ and TQC@PFC-1.



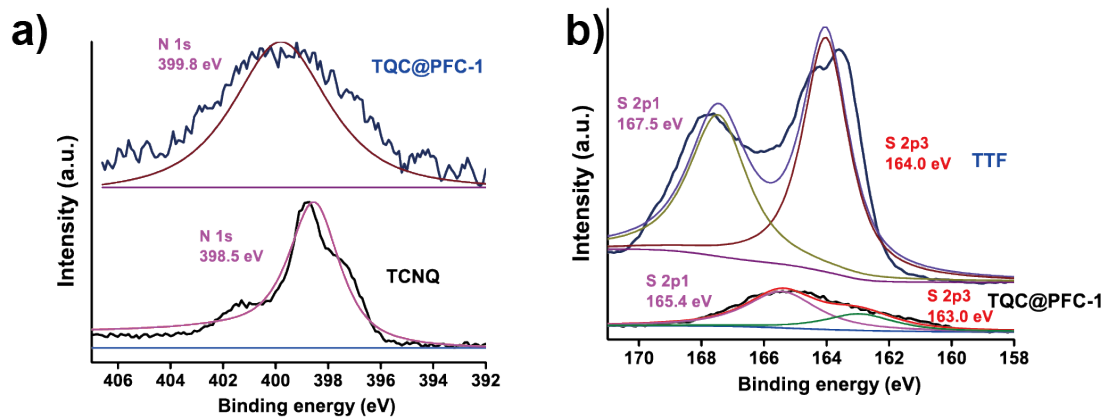

**Figure S8** X-ray Photoelectron Spectroscopy measurements of **TQC@PFC-1**. a) N 1s spectrum of TCNQ and **TQC@PFC-1**. b) S 2p spectrum of TTF and **TQC@PFC-1**.

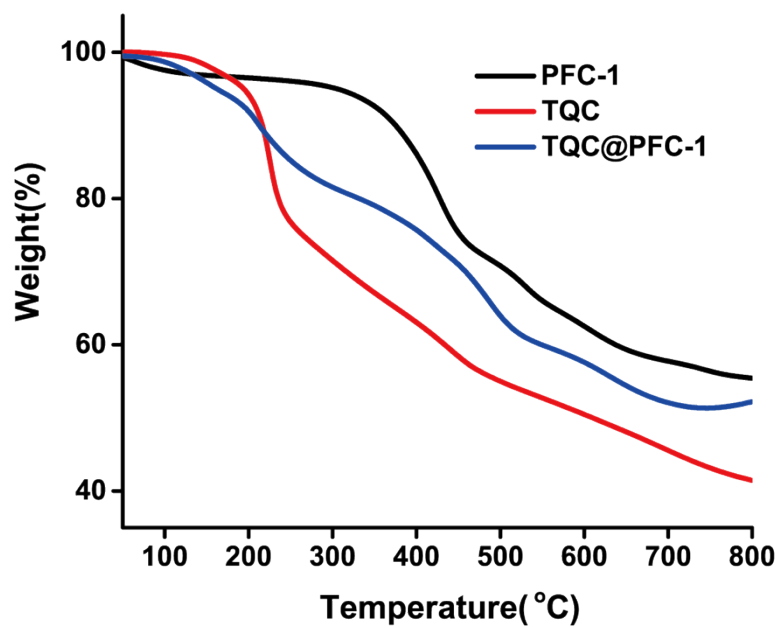

**Figure S9** Thermogravimetric analyses of PFC-1, TQC and TQC@PFC-1.

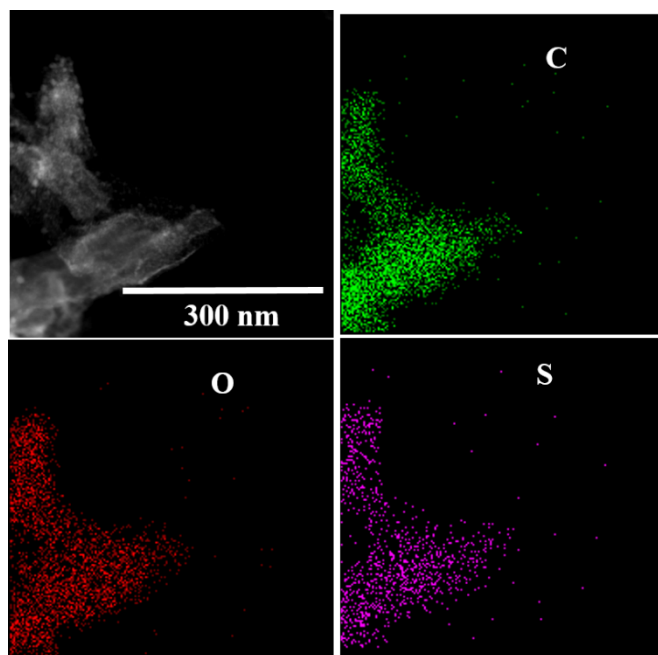

**Figure S10** Transmission electron microscopy (TEM) image of TQC@PFC-1 and the corresponding EDX mapping of C, O, and S.

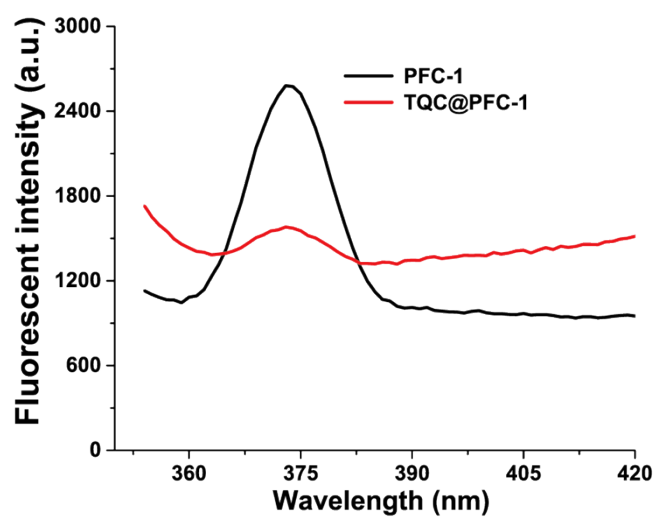

**Figure S11** The fluorescent spectra of **PFC-1** and **TQC@PFC-1** (0.025 mg/mL).

The fluorescence spectrum was measured by exciting the sample at 320 nm.

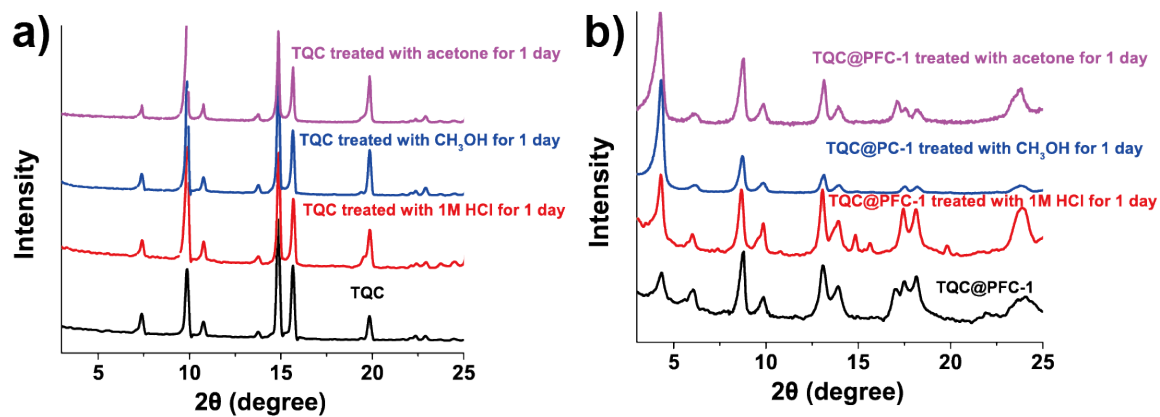

**Figure S12** The PXRD patterns of TQC and TQC@PFC-1 before and after incubation with acetone, CH<sub>3</sub>OH, or 1 M HCl for 24 h.

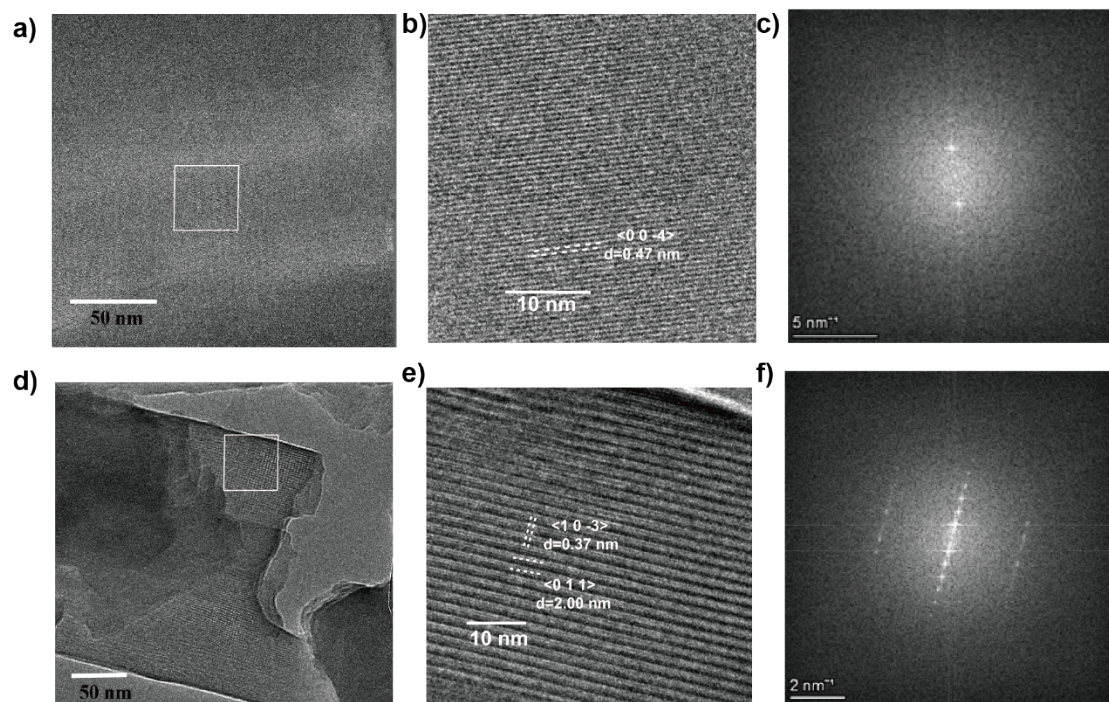

**Figure S13** Structural profile of TQC and PFC-1 by cryo-TEM. a) Cryo-TEM image of TQC; b) The amplified cryo-TEM structure and c) the FFT pattern of the selected selected area highlighted in the white frame in a) . d) Cryo-TEM image of PFC-1; b) The amplified cryo-TEM structure and c) the FFT pattern of the selected selected area highlighted in the white frame in d)

**Table S1** DLS characterizations of PFC-1, TQC and **TQC@PFC-1**.

| <b>Sample</b>    | <b>Size (nm)</b> | <b>Zeta potential(mV)</b> | <b>PDI</b> |
|------------------|------------------|---------------------------|------------|
| <b>PFC-1</b>     | 228.9 ± 5.7      | -32.9 ± 3.0               | 0.337      |
| <b>TQC</b>       | 4380 ± 298       | -29.2 ± 1.0               | 0.526      |
| <b>TQC@PFC-1</b> | 244.8 ± 20.5     | -17.4 ± 1.4               | 0.188      |

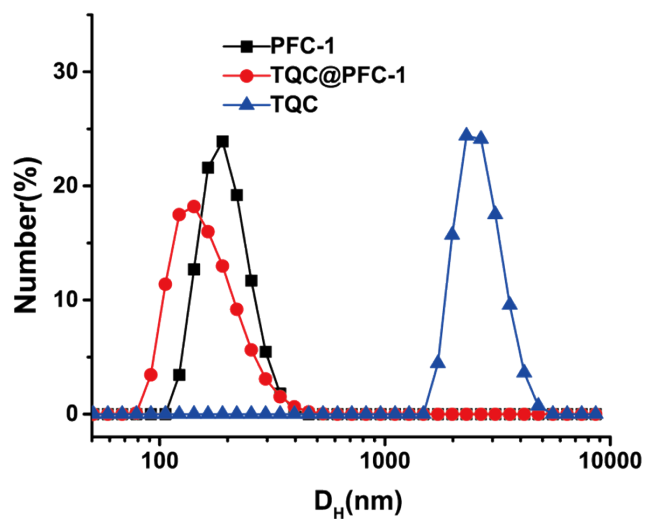

**Figure S14** The size distributions of PFC-1, TQC, and TQC@PFC-1 dispersed in water.



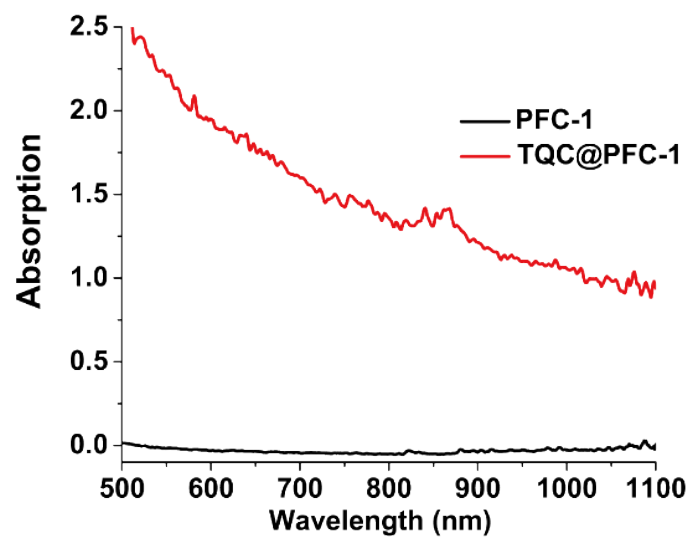

**Figure S15** UV/Vis absorption spectra of aqueous solutions of PFC-1 and TQC@PFC-1 (1 mg/mL).

The photothermal conversion efficiencies ( $\eta$ ) were calculated using equations according to the previous method<sup>1,2</sup>.

$$\eta = \frac{hs(T_{max} - T_{surr})}{I(1 - 10^{-A_{1080}})}$$

$h$  is the heat transfer coefficient;  $s$  is the surface area of the container.  $I$  is the laser power and  $A$  is the absorbance at 1080 nm.  $T_{max}$  and  $T_{surr}$  are the maximum steady state temperature and the environmental temperature, respectively.

$$hs = \frac{mC_{water}}{\tau}$$

$m$  is the mass of the solution containing the photoactive material,  $C$  is the specific heat capacity of the solution ( $C_{water} = 4.2 \text{ J}/(\text{g}\cdot^\circ\text{C})$ ), and  $\tau$  is the associated time constant.

$$t = -\tau \ln(\theta)$$

$\theta$  is a dimensionless parameter, known as the driving force temperature.

$$\theta = \frac{T - T_{surr}}{T_{max} - T_{surr}}$$

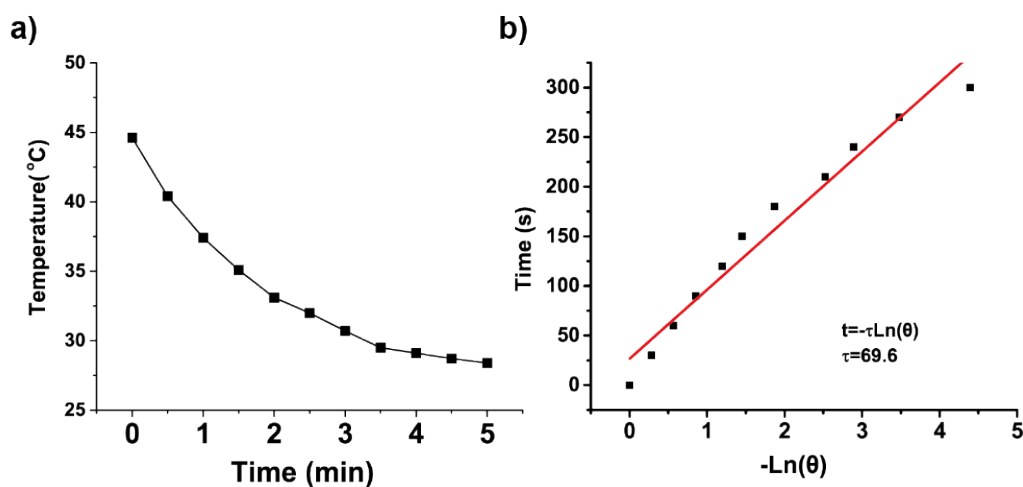

**Figure S16** a) The cooling curve of TQC@PFC-1 (1 mg/mL) after the irradiation of 1080 nm laser ( $0.8 \text{ W}/\text{cm}^2$ ) and b) its corresponding time- $\ln\theta$  linear curve.

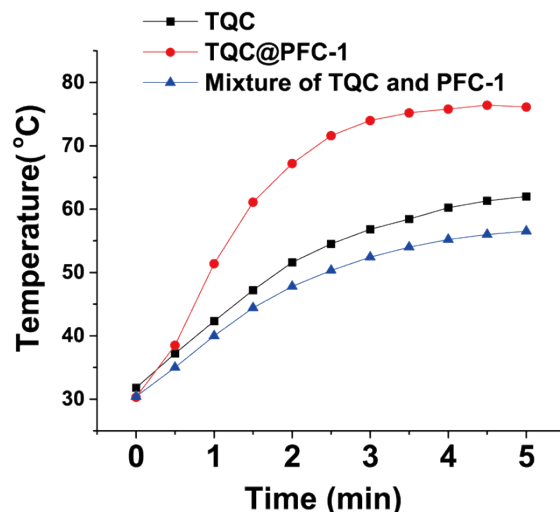

**Figure S17** Comparison of the photothermal effect of TQC, physical mixture of TQC and PFC-1, and **TQC@PFC-1** aqueous solution (1 mg/mL) under 1080 nm laser irradiation (1.5 W/cm<sup>2</sup>).

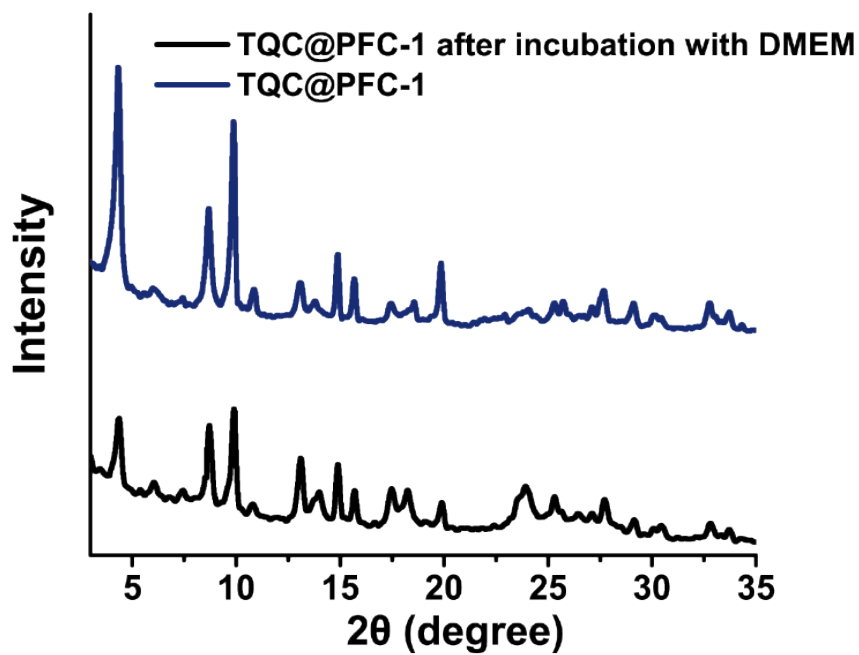

**Figure S18** PXRD patterns of TQC@PFC-1 before and after incubation with cell culture medium for 24 h

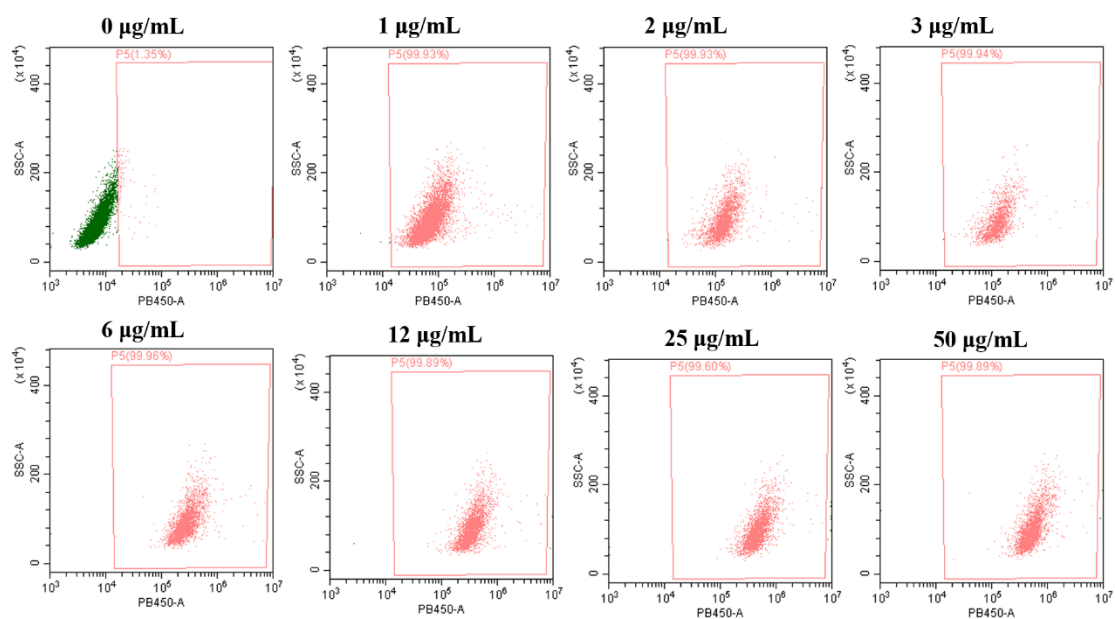

**Figure S19** Flow cytometry analysis was performed to evaluate the delivery efficiency of **TQC@PFC-1**. HeLa cells were treated with varying concentrations of HOFs for 18 hours, followed by flow cytometry analysis to quantify PFC-1-positive cells.

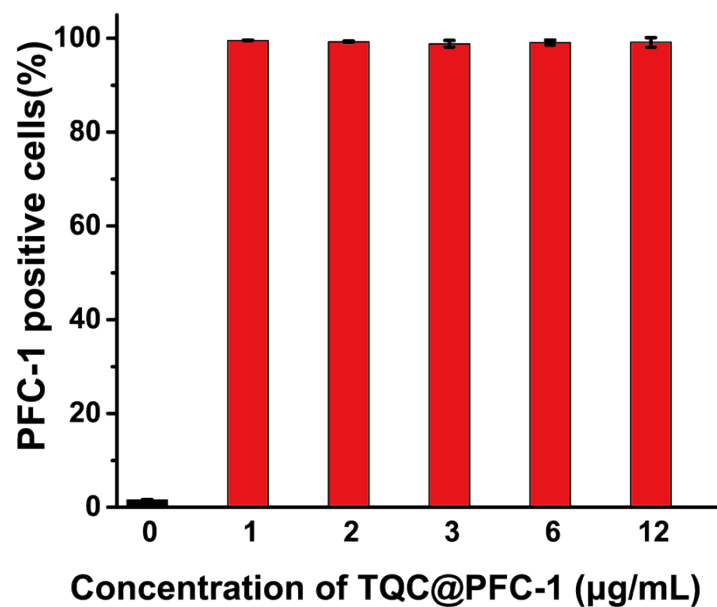

**Figure S20** Cellular uptake study of TQC@PFC-1 by HeLa cells. The cells were incubated with different concentrations of TQC@PFC-1 for 18 h as indicated, followed by flow cytometry analysis to quantify PFC-1 positive cells. The data was presented as mean  $\pm$  SD (n=3).

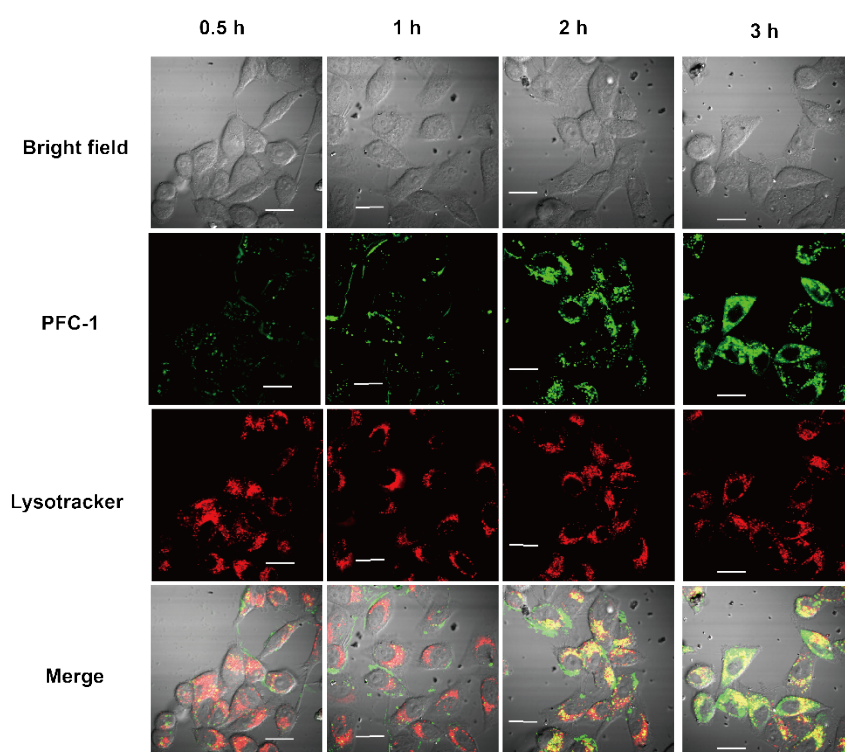

**Figure S21** Confocal laser scanning microscopy (CLSM) images of HeLa cells incubated with 0.1 mg/mL TQC@PFC-1 at different time points. The endosome/lysosome was stained with 100 nM LysoTracker@Red before CSLM imaging. Scale bar: 20  $\mu$ m.

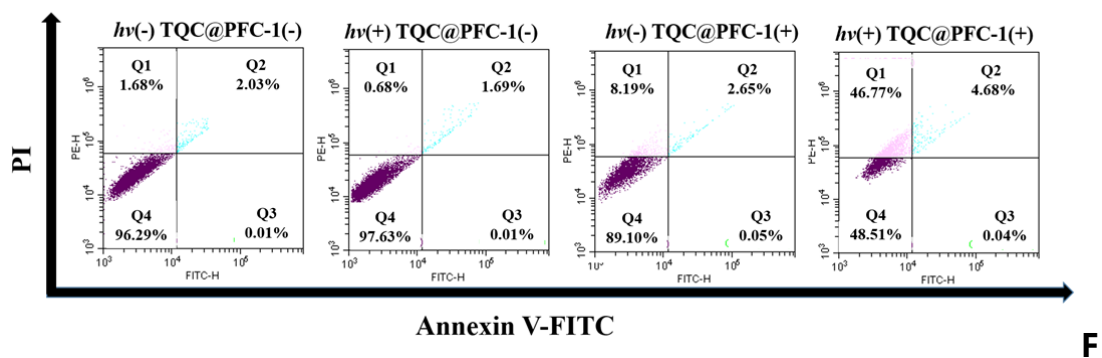

**figure S22** The cell apoptosis assay was performed on HeLa cells treated with PBS or TQC@PFC-1 with 1080 nm laser ( $1.5 \text{ W/cm}^2$ ) irradiation for 5 minutes.



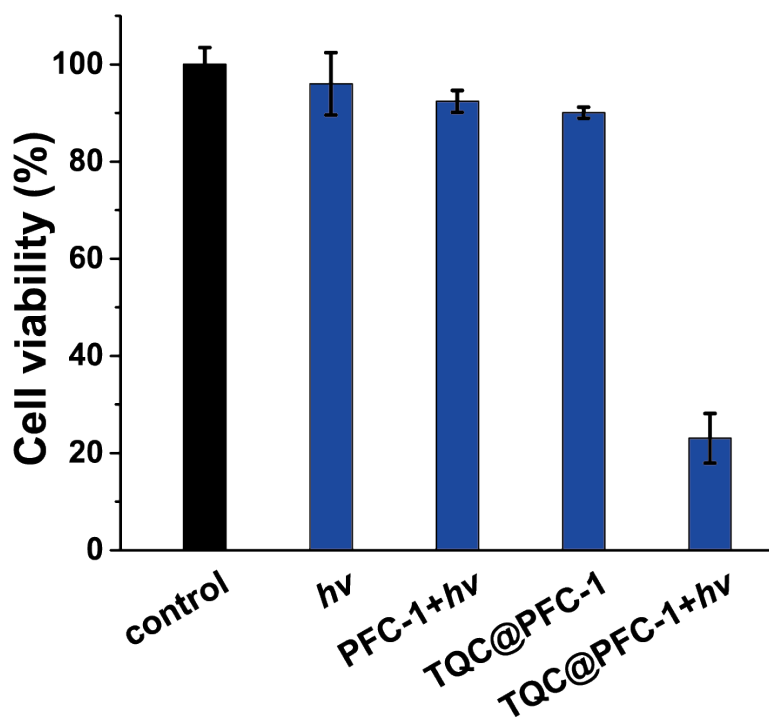

**Figure S23** Photothermal ablation of B16F10 cells by TQC@PFC-1. The Viability of B16F10 cells treated with 0.2 mg/mL PFC-1 or 0.2 mg/mL TQC@PFC-1 for 2 h, followed by light irradiation (1080 nm, 1.5 W/cm<sup>2</sup>) for 5 min. as indicated. The differently treated cells were further incubated for 18 h before the determination of cell viability using MTT assay. The data was presented as mean  $\pm$  SD (n=3).

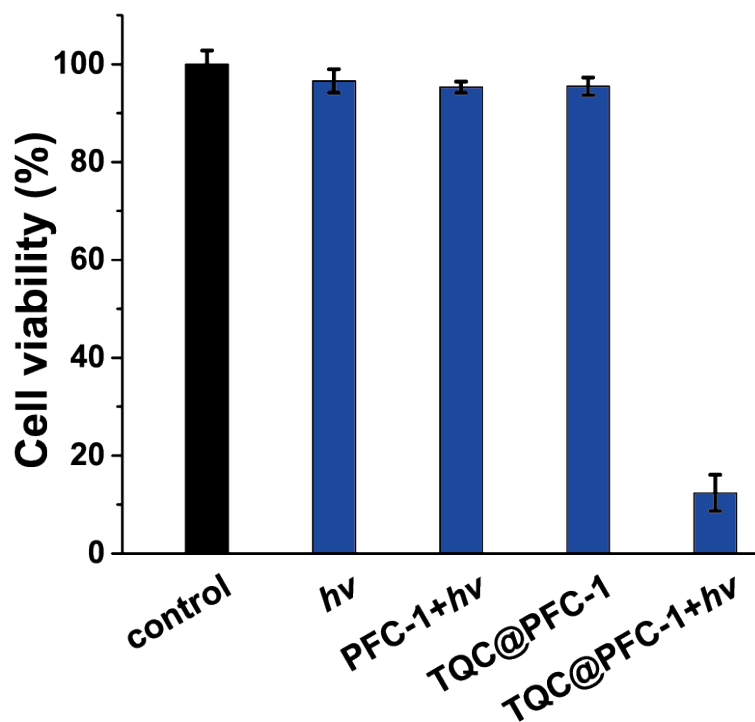

**Figure S24** Photothermal ablation of 4T1 cells by TQC@PFC-1. The Viability of 4T1 cells treated with 0.2 mg/mL PFC-1 or 0.2 mg/mL TQC@PFC-1 for 2 h, followed by light irradiation (1080 nm, 1.5 W/cm<sup>2</sup>) for 5 min. as indicated. The differently treated cells were further incubated for 18 h before the determination of cell viability using MTT assay. The data was presented as mean  $\pm$  SD (n=3).

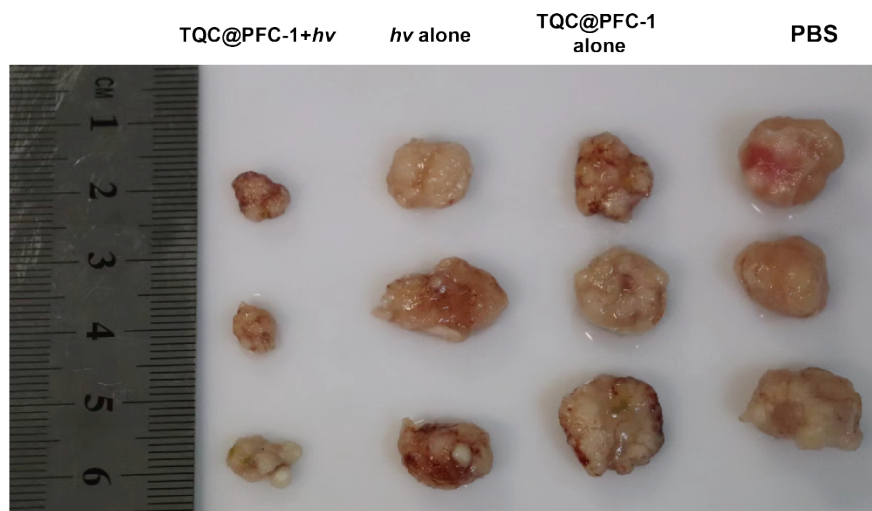

**Figure S25** A representative image of tumors from four groups of mice after different treatments as indicated.

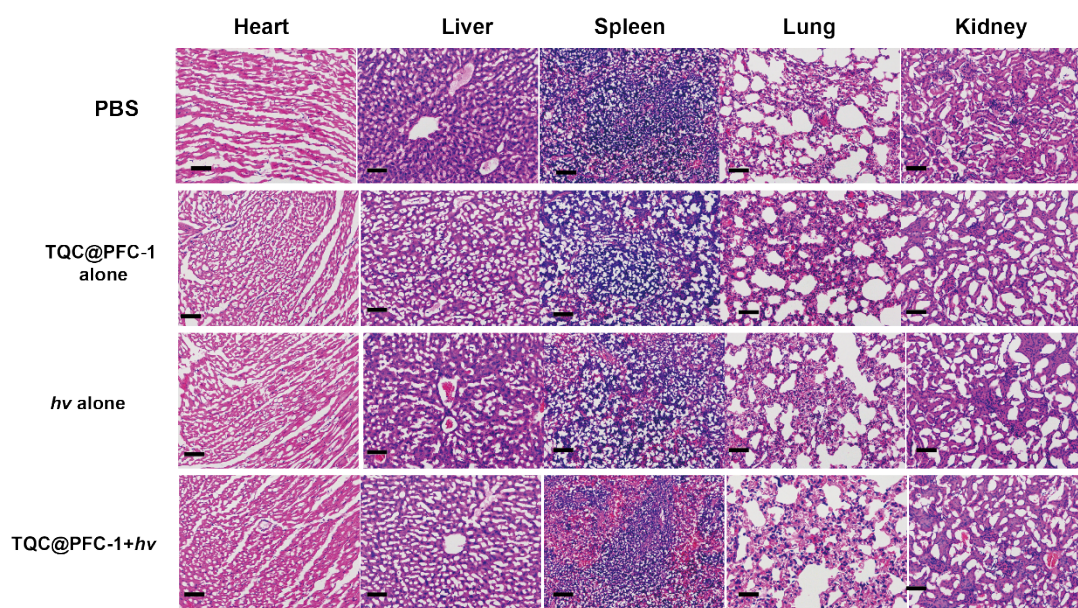

**Figure S26** Histological hematoxylin and eosin (H&E) analysis of the major organs of mice received different treatments as indicated. Scale bar 200  $\mu\text{m}$ .

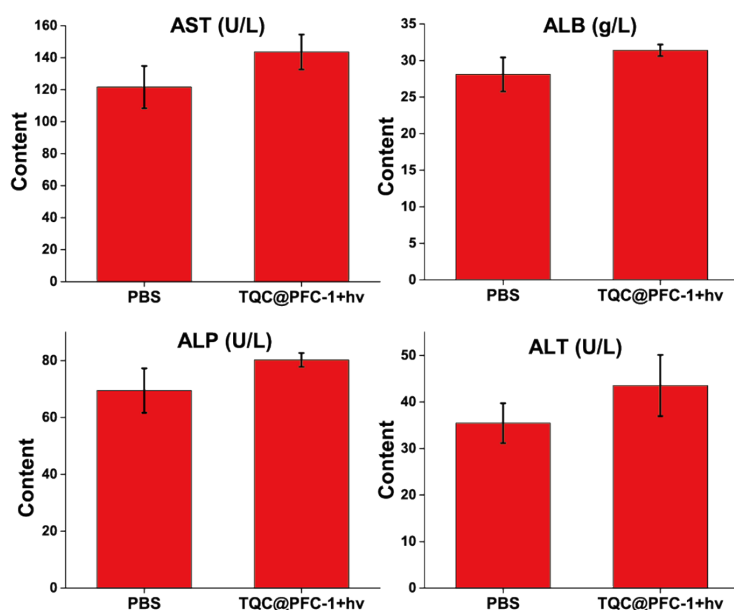

**Figure S27** Liver function tests were performed on mice treated with TQC@PFC-1 and laser irradiation.

## Reference

1. Y. Wang, W. Zhu, W. Du, X. Liu, X. Zhang, H. Dong and W. Hu, *Angew. Chem. Int. Ed.* 2018, **57**, 3963-3967.
2. L. Zeng, L. Huang, Z. Wang, J. Wei, K. Huang, W. Lin, C. Duan and G. Han, *Angew. Chem. Int. Ed.* 2021, **60**, 23569-23573.
